# Supplementary material
Source: ML conference proceedings conference paper supplement (https://proceedings.mlr.press/v37/sunb15.html)
Supplement: Supplementary file 1 [file sunb15-supp.pdf]

---

# Multi-view Sparse Co-clustering via Proximal Alternating Linearized Minimization

---

## Appendix A: related definitions

**Definition 1** (*Semi-algebraic sets and functions*) A subset  $S$  of  $\mathbb{R}^d$  is a real semi-algebraic set if there exists a finite number of real polynomial functions  $g_{ij}, h_{ij}: \mathbb{R}^d \rightarrow \mathbb{R}$  such that

$$S = \bigcup_{j=1}^p \bigcap_{i=1}^q \{\mathbf{u} \in \mathbb{R}^d : g_{ij}(\mathbf{u}) = 0 \text{ and } h_{ij}(\mathbf{u}) < 0\}.$$

Moreover, a function  $h$  is called semi-algebraic if its graph

$$\{(u, t) \in \mathbb{R}^{d+1} : h(u) = t\}$$

is a semi-algebraic subset of  $\mathbb{R}^{d+1}$ .

Semi-algebraic sets are stable under the operations of finite union, finite intersections, complementation and Cartesian product. The following are the semi-functions or the property of semi-functions that are used in the main text:

- Indicator function of semi-algebraic sets.
- Finite sums and product of semi-algebraic functions.
- Composition of semi-algebraic functions.
- Real polynomial functions.

For any subset  $S \in \mathbb{R}^d$  and any point  $\mathbf{x} \in \mathbb{R}^d$ , we define the distance from  $\mathbf{x}$  to  $S$  as follows:

$$\text{dist}(\mathbf{x}, S) := \inf\{\|\mathbf{y} - \mathbf{x}\| : \mathbf{y} \in S\}.$$

when  $S \in \emptyset$ , we have  $\text{dist}(\mathbf{x}, S) = 0$  for all  $\mathbf{x}$ . Let  $\eta \in (0, +\infty]$  and  $\Phi_\eta$  be the class of all concave and continuous functions  $\psi : [0, \eta] \rightarrow \mathbb{R}_+$  that satisfy the following conditions: (1)  $\psi(0) = 0$ ; (2)  $\psi$  is  $C^1$  on  $(0, \eta)$  and continuous at 0; (3) for all  $s \in (0, \eta) : \psi'(s) > 0$ .

**Definition 2** (*Kurdyka-Lojasiewicz property*) Let  $\sigma : \mathbb{R} \rightarrow (-\infty, +\infty]$  be a proper and lower semicontinuous.

(i) The function  $\sigma$  is said to have the *Kurdyka-Lojasiewicz (KL) property* at  $\bar{\mathbf{u}} \in \text{dom} \partial\sigma := \{\mathbf{u} \in \mathbb{R}^d : \partial\sigma \neq \emptyset\}$  if there exists  $\eta \in (0, +\infty]$ , a neighborhood  $\mathbf{U}$  of  $\bar{\mathbf{u}}$  and a function  $\psi \in \Phi_\eta$ , such that for all

$$\mathbf{u} \in \mathbf{U} \cap [\sigma(\bar{\mathbf{u}}) < \sigma(\mathbf{u}) < \sigma(\bar{\mathbf{u}}) + \eta],$$

the following equality holds

$$\psi'(\sigma(\mathbf{u}) - \sigma(\bar{\mathbf{u}})) \text{dist}(0, \partial\sigma(\mathbf{u})) \geq 1.$$

(ii) If  $\sigma$  satisfy KL property at each point of  $\text{dom} \partial\sigma$  then  $\sigma$  is called KL function.
